# Supplementary material
Source: Springer Nature journal article supplement (https://www.springermedizin.de/resource/supplementary/13075_2011_3074_MOESM3_ESM.pdf/9693658)

## OP-1 treated

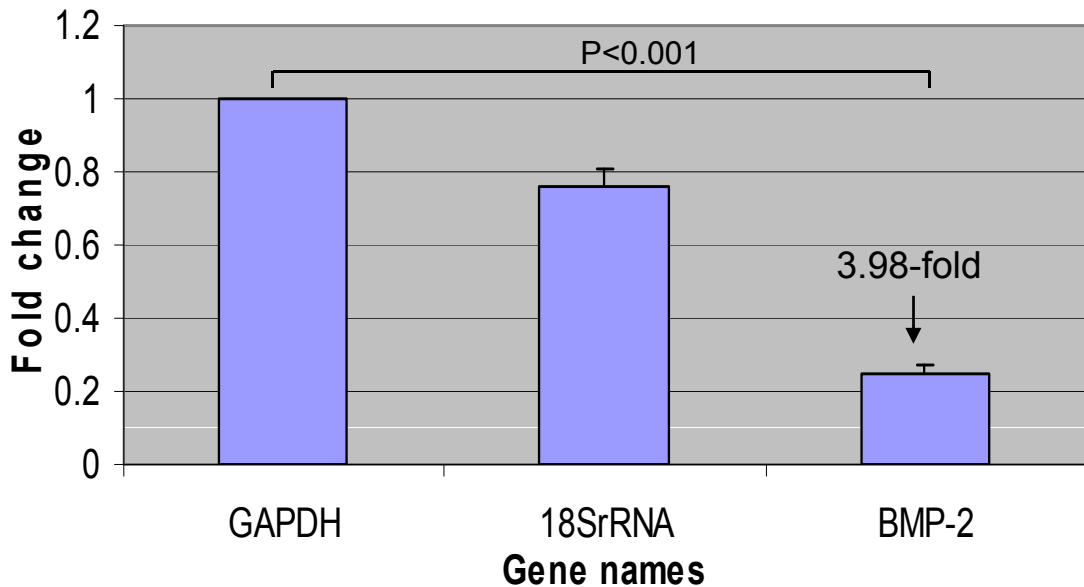

Supplement: MOESM3 [file 9693658]
